# Supplementary material for: Effects of Lecanicillium lecanii strain JMC-01 on the physiology, biochemistry, and mortality of Bemisia tabaci Q-biotype nymphs
Source: PeerJ. 2019 Sep 16;7:e7690. doi: 10.7717/peerj.7690 (PMC6752192; doi:10.7717/peerj.7690)
Supplement: Supplemental Information 1 — Raw data for Figs. 2 and 3 for the time period of 1–6 days. [file peerj-07-7690-s001.xlsx]

## Sheet: Fig. 2
Corrected cumulative mortality of L. lecanii JMC-01 infestation on B. tabaci nymphs
	1d	2d	3d	4d	5d	6d
egg	4.44444	11.1111	14.4444	22.2222	24.4444	25.5556
1st instar nymph	8.88889	20	31.1111	47.7778	57.7778	64.4444
2nd instar nymph	12.2222	28.8889	50	65.5556	78.8889	82.2222
3rd instar nymph	11.1111	28.8889	45.5556	61.1111	73.3333	75.5556
4th instar nymph	7.77778	14.4444	25.5556	35.5556	44.4444	48.8889

## Sheet: Fig. 3
Cumulative corrected mortality of 3rd instar B. tabaci nymphs following exposure to different concentrations of L. lecanii JMC-01
	10⁴ conidia/mL			10⁵ conidia/mL			10⁶ conidia/mL			10⁷ conidia/mL			10⁸ conidia/mL
	repeat1	repeat2	repeat3	repeat1	repeat2	repeat3	repeat1	repeat2	repeat3	repeat1	repeat2	repeat3	repeat1	repeat2	repeat3
1	6.66667	3.33333	3.33333	6.66667	3.33333	6.66667	6.66667	6.66667	6.66667	6.66667	6.66667	6.66667	10	6.66667	10
2	10	6.66667	10	13.3333	10	10	13.3333	13.3333	13.3333	20	16.6667	16.6667	23.3333	23.3333	23.3333
3	20	16.6667	16.6667	20	23.3333	20	26.6667	26.6667	26.6667	36.6667	33.3333	33.3333	43.3333	43.3333	43.3333
4	30	26.6667	26.6667	30	33.3333	30	40	43.3333	40	53.3333	50	50	63.3333	56.6667	60
5	33.3333	30	30	36.6667	40	36.6667	46.6667	50	46.6667	60	63.3333	60	73.3333	70	73.3333
6	33.3333	33.3333	33.3333	40	43.3333	40	50	53.3333	50	63.3333	66.6667	63.3333	76.6667	73.3333	76.6667
