# Supplementary material for: Effects of Lecanicillium lecanii strain JMC-01 on the physiology, biochemistry, and mortality of Bemisia tabaci Q-biotype nymphs
Source: PeerJ. 2019 Sep 16;7:e7690. doi: 10.7717/peerj.7690 (PMC6752192; doi:10.7717/peerj.7690)
Supplement: Supplemental Information 2 — Raw data for Figs. 4–6 for the time period of 1–5 days. [file peerj-07-7690-s002.xlsx]

## Sheet: Fig. 4
SOD activities of 3rd instar B. tabaci nymphs infested with L. lecanii JMC-01
	control			infection
	repeat1	repeat2	repeat3	repeat1	repeat2	repeat3
1d	38.75	38.46	39.59	33.65	35.32	36.71
2d	40.0346	39.5474	39.2226	43.3442	45.2774	41.2075
3d	38.467	38.0769	37.6867	41.9628	42.3783	43.1054
4d	35.3964	35.1761	34.3683	31.2842	31.6427	32.1805
5d	32.7965	31.8126	30.632	34.12	35.22	35.23

## Sheet: Fig. 5
POD activities of 3rd instar B. tabaci nymphs infested with L. lecanii JMC-01
	control			infection
	repeat1	repeat2	repeat3	repeat1	repeat2	repeat3
1d	7.51049	8.17318	8.76224	10.9039	13.3028	12.1034
2d	6.40892	7.7325	9.12574	14.7508	12.9179	16.4965
3d	9.77242	7.09505	8.43373	18.177	21.7411	19.959
4d	6.17971	3.83142	4.57298	9.80614	9.80614	9.88157
5d	8.78	8.99707	9.54904	9.23	9	8.58

## Sheet: Fig. 6
CAT activities of 3rd instar B. tabaci nymphs infested with L. lecanii JMC-01
	CK			infection
	repeat1	repeat2	repeat3	repeat1	repeat2	repeat3
1d	4.01082	3.47206	3.41219	4.31	4.29	4.12
2d	3.17	3.28	3.46	5.52	5.96	5.67
3d	4.55	4.73	4.63	6.56	6.41	6.39
4d	4.42	4.93	4.92	1.10387	2.20774	1.59448
5d	4.22	4.667	4.89137	1.37	1.50243	1.06422
