# Supplementary material for: Effects of Lecanicillium lecanii strain JMC-01 on the physiology, biochemistry, and mortality of Bemisia tabaci Q-biotype nymphs
Source: PeerJ. 2019 Sep 16;7:e7690. doi: 10.7717/peerj.7690 (PMC6752192; doi:10.7717/peerj.7690)
Supplement: Supplemental Information 3 — Raw data for Figs. 7–9 for the time period of 1–5 days. [file peerj-07-7690-s003.xlsx]

## Sheet: Fig. 7
Effects of CarE activities of the 3rd instar nymph of B. tabaci infested with L. lecanii JMC-01
	control			infection
	repeat1	repeat2	repeat3	repeat1	repeat2	repeat3
1d	3.37442	3.77402	4.17362	4.4053	4.60255	5.19431
2d	3.69655	3.57053	3.65455	4.47368	4.73684	4.89474
3d	5.08554	4.27831	4.31867	10.6921	11.0682	8.91901
4d	3.42825	3.35373	3.65184	3.86626	4.73048	4.0482
5d	3.09538	3.32837	3.0621	3.52876	3.2966	3.2966

## Sheet: Fig. 8
Effects of AchE activities of the 3rd instar nymph of B. tabaci infested with L. lecanii JMC-01
	control			infection
	repeat1	repeat2	repeat3	repeat1	repeat2	repeat3
1d	0.0907996	0.0768867	0.0688319	0.0726527	0.0628934	0.0834964
2d	0.0910785	0.113672	0.120026	0.142424	0.161002	0.168963
3d	0.0847139	0.0665161	0.0796938	0.302392	0.324111	0.307404
4d	0.136816	0.10818	0.115816	0.184868	0.160789	0.168557
5d	0.0872706	0.057977	0.057977	0.0561892	0.045973	0.0366081

## Sheet: Fig. 9
Effects of GSTs activities of the 3rd instar nymph of B. tabaci infested with L. lecanii JMC-01
	control			infection
	repeat1	repeat2	repeat3	repeat1	repeat2	repeat3
1d	25.68	23.74	21.86	62.51	64.7415	61.9509
2d	26.74	23.18	21.86	65.67	65.6731	61.2056
3d	15.15	11.704	15.1463	62.78	57.7386	62.7792
4d	15.05	17.3395	15.7037	25.56	21.5646	25.1587
5d	16.13	16.415	19.5829	26.11	25.3096	23.7026
