# Supplementary material for: Effects of Lecanicillium lecanii strain JMC-01 on the physiology, biochemistry, and mortality of Bemisia tabaci Q-biotype nymphs
Source: PeerJ. 2019 Sep 16;7:e7690. doi: 10.7717/peerj.7690 (PMC6752192; doi:10.7717/peerj.7690)
Supplement: Supplemental Information 4 — Raw data for Figs. 10–12 for the time period of 0–72 h. [file peerj-07-7690-s004.xlsx]

## Sheet: Fig. 10
Changes in weight of 3rd instar B. tabaci nymphs infected with V. lecanii JMC-01
	infection			control
	repeat1	repeat2	repeat3	repeat1	repeat2	repeat3
0h	0.0019	0.002	0.0023	0.0022	0.0023	0.0023
12h	0.0023	0.0024	0.0024	0.0024	0.0025	0.0026
24h	0.0025	0.0023	0.0025	0.0027	0.0026	0.0028
36h	0.0027	0.0029	0.0028	0.0026	0.0027	0.0028
48h	0.003	0.0029	0.0029	0.0029	0.0029	0.0028
60h	0.0034	0.0036	0.004	0.003	0.0032	0.0032
72h	0.004	0.0041	0.0038	0.0032	0.0031	0.0034

## Sheet: Fig. 11
Changes in water content of 3rd instar B. tabaci nymphs infected with L. lecanii JMC-01
	infection			control
	repeat1	repeat2	repeat3	repeat1	repeat2	repeat3
0h	82	83	83	78	78	80
12h	79	80	81	75	75	78
24h	78	77	75	76	78	76
36h	70	69	71	70	69	71
48h	64	66	66	70	69	69
60h	60	59	59	68	68	69
72h	56	55	56	63	66	65

## Sheet: Fig. 12
Changes in fat content of 3rd instar B. tabaci nymphs infected with L. lecanii JMC-01
	infection			control
	repeat1	repeat2	repeat3	repeat1	repeat2	repeat3
0h	30	28	28	28	28	28
12h	26	26	24	26	25	25
24h	28	26	29	28	28	25
36h	26	25	25	26	26	25
48h	24	23	22	24	26	26
60h	17	19	19	26	23	27
72h	11	13	14	21	21	18
